# Supplementary material for: Interplay of unique N⋯π pnicogen and H⋯π/H⋯O hydrogen bonding interactions in the heterodimers of nitromethane with acetylene and benzene as π-electron donors: experimental characterization at low temperatures under isolated conditions with computational corroboration
Source: Royal Society of Chemistry journal article supplement (doi:10.1039/d2cp03744k), 2022-01-01
Supplement: d2cp03744k1.pdf [file d2cp03744k1.pdf]

## Electronic Supplementary Information

**Interplay of unique  $N\cdots\pi$  pnicoen and  $H\cdots\pi/H\cdots O$  hydrogen bonding interaction in the heterodimers of nitromethane with acetylene and benzene as  $\pi$ -electron donors: Experimental characterization at low temperatures under isolated conditions with computational corroboration**

**Nandalal Mahapatra,<sup>a,b</sup> Swaroop Chandra,<sup>a,b</sup> N. Ramanathan<sup>a,b\*</sup> and K.Sundararajan<sup>a,b</sup>**

<sup>a</sup>Materials Chemistry & Metal Fuel Cycle Group, Indira Gandhi Centre for Atomic Research, Kalpakkam-603102, Tamilnadu, India, nram@igcar.gov.in

<sup>b</sup>Indira Gandhi Centre for Atomic Research, A CI of Homi Bhabha National Institute, Kalpakkam 603102, Tamilnadu, India

| SerialNo.       | Subject                                                                                                                                                                                                                                         |
|-----------------|-------------------------------------------------------------------------------------------------------------------------------------------------------------------------------------------------------------------------------------------------|
| <b>Fig.S1</b>   | NMAcIII* optimized at B2PLYP/aug-cc-pVDZ with empirical dispersion GD3.                                                                                                                                                                         |
| <b>Fig.S2</b>   | C-H stretching region of acetylene in the infrared spectra recorded after annealing N <sub>2</sub> and Ar matrixes containing greater concentrations of acetylene, in acetylene/nitromethane depositions.                                       |
| <b>Fig.S3</b>   | C-H stretching region of acetylene in the infrared spectra recorded after annealing Ar matrixes containing greater concentrations of acetylene, in acetylene/nitromethane depositions.                                                          |
| <b>Fig.S4</b>   | Geometry of NM:Ac::1:2 and NM:Ac::2:1 heterotrimers corresponding to the global minima on the respective PESs at MP2/aug-cc-pVDZ level.                                                                                                         |
| <b>Table S1</b> | Relevant bond distances and bond angles in all the heterodimers of NMAc and NMBz.                                                                                                                                                               |
| <b>Table S2</b> | Comparison of experimental shifts associated with the perturbed modes of submolecules within NMAc and NMBz dimers, with those predicted by harmonic frequency calculations at b2plyp/aug-cc-pVDZ level of theory with empirical dispersion GD3. |
| <b>Table S3</b> | NBO delocalization and associated second-order perturbation energies, in NMAc and NMBz Heterodimers.                                                                                                                                            |
| <b>Table S4</b> | <p>Co-ordinates of all the heterodimers in different levels of theory.</p> <ul style="list-style-type: none"> <li>❖ MP2/aug-cc-pVTZ</li> <li>❖ MP2/aug-cc-pVDZ</li> <li>❖ B2PLYP-GD3/aug-cc-pVDZ</li> </ul>                                     |

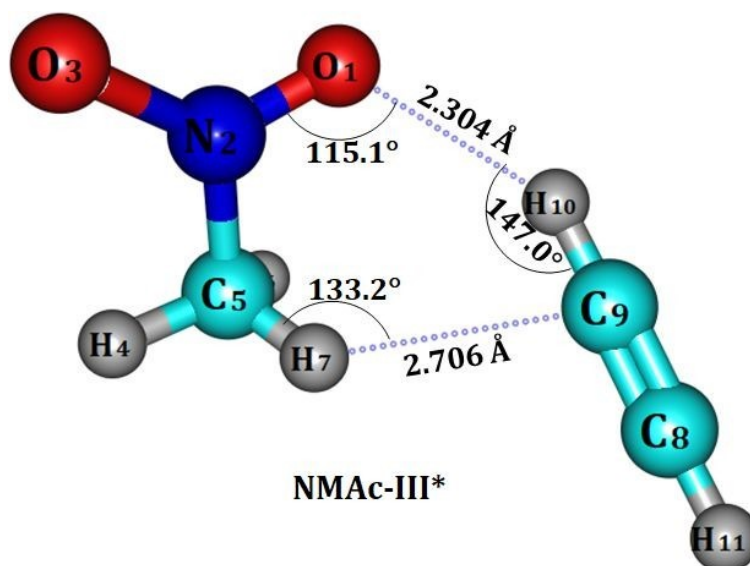

**FigureS1.** NMAcIII\* optimized at B2PLYP/aug-cc-pVDZ with empirical dispersion GD3.

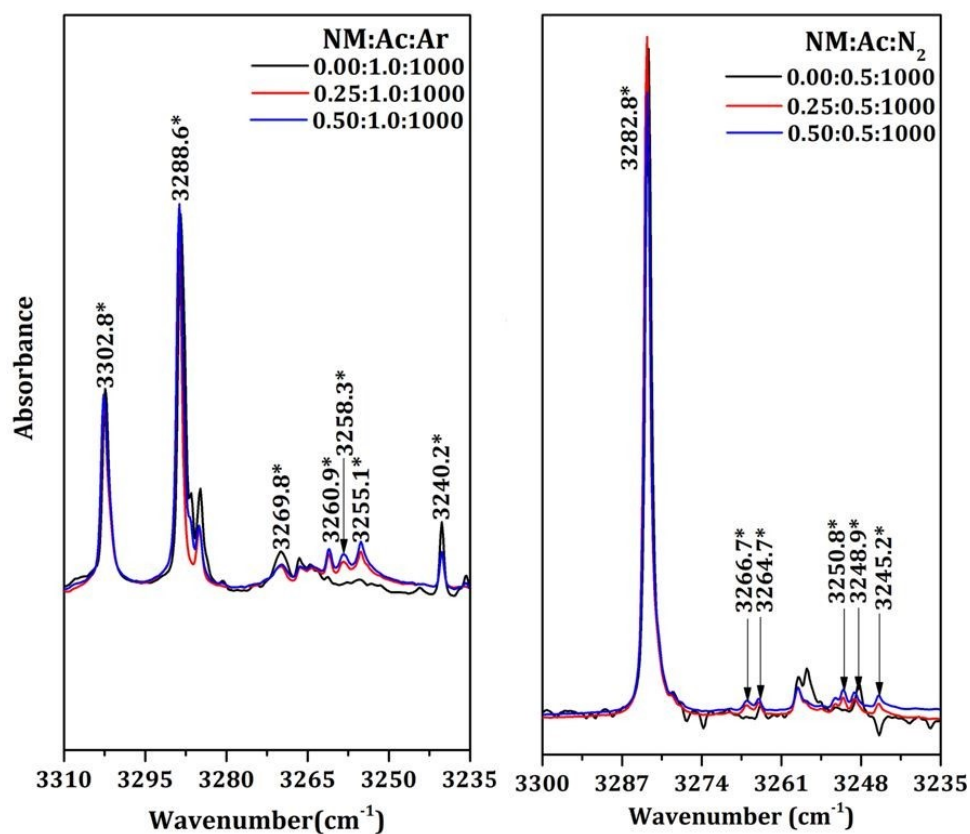

**Figure S2.** C-H stretching region of acetylene in the infrared spectra recorded after annealing  $N_2$  and Ar matrixes containing greater concentrations of acetylene, in acetylene/nitromethane depositions.

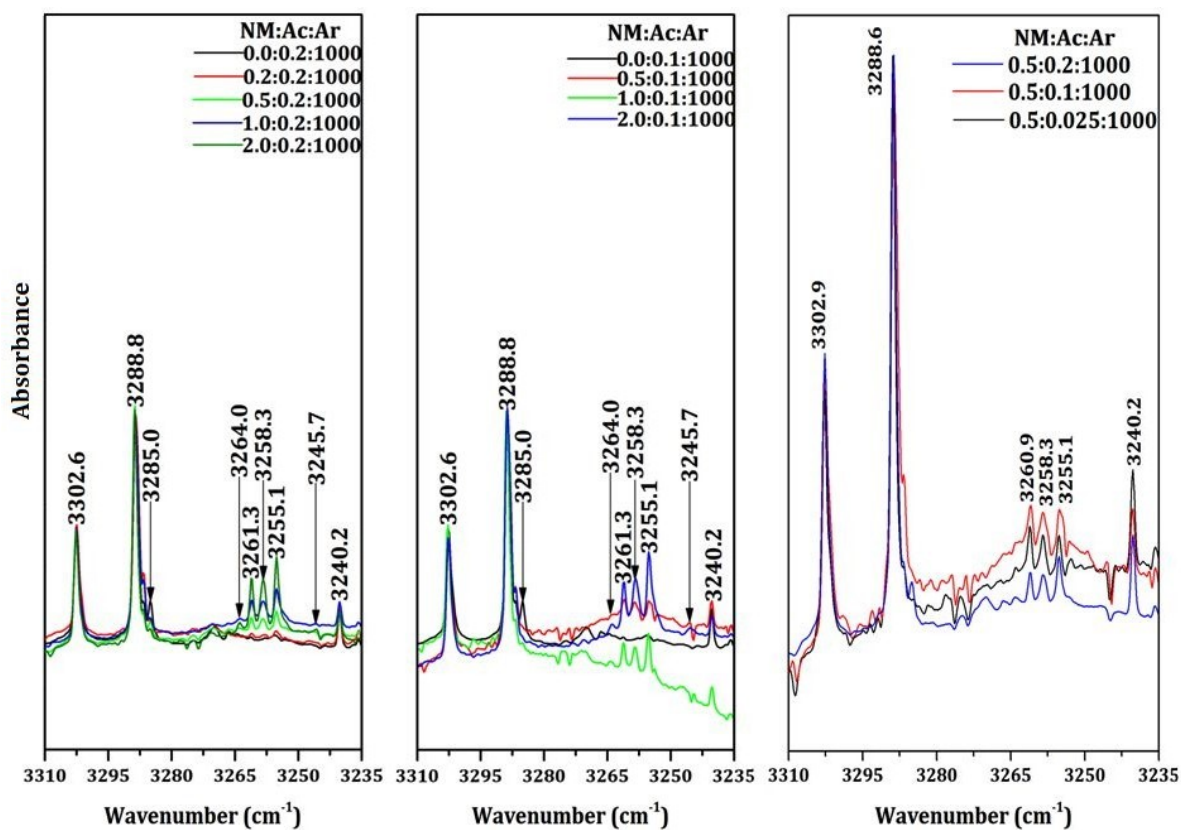

**Figure S3.** C-H stretching region of acetylene in the infrared spectra recorded after annealing Ar matrixes containing greater concentrations of acetylene, in acetylene/ nitromethane depositions.

**NM:Ac::1:2**

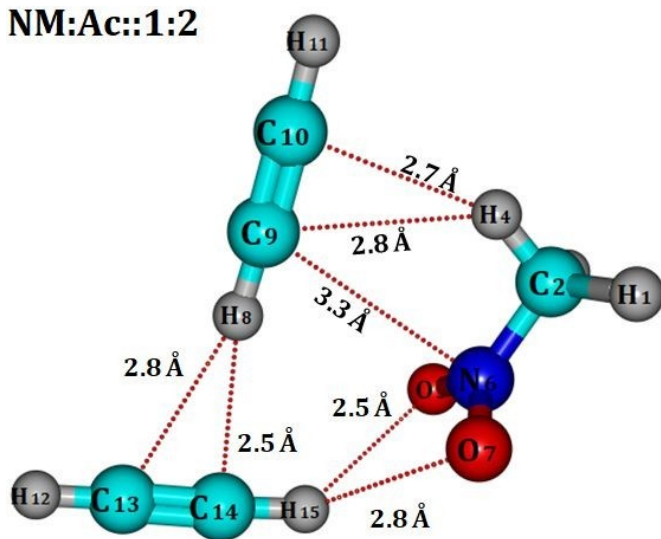

**NM:Ac::2:1**

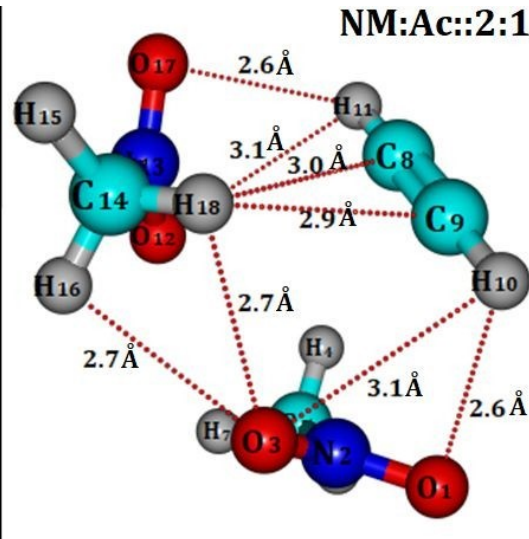

**Figure S4.** Geometry of NM:Ac::1:2 and NM:Ac::2:1 heterotrimers corresponding to the global minima on the respective PESs at MP2/aug-cc-pVDZ level.

**Table S1.** Relevant bond distances and bond angles in all the heterodimers of NMAc and NMBz.

| Heterodimers | Bond lengths (Å) | Bond angles (degree)         |
|--------------|------------------|------------------------------|
| NMAc-I       | C8---H4: 3.082   | $\angle$ C5-H4-C8= 140.5°    |
|              | C9---N2: 2.949   | $\angle$ C9-N2-O1= 84.8°     |
| NMAc-II      | H10---O1: 2.304  | $\angle$ O1-H10-C9= 147.0°   |
|              | C9---H6: 2.706   | $\angle$ C5-H6-C9= 133.2°    |
| NMAc-III     | C9---N2: 3.155   | $\angle$ C8-N2-O3= 81.9°     |
|              | C8---N2: 3.221   | $\angle$ C9-N2-O1= 81.7°     |
|              |                  |                              |
| NMBz-I       | H14---C3: 2.768  | $\angle$ C3-H4-C15= 121.1°   |
|              | N17---C3: 3.029  | $\angle$ C3-N17-O19= 92.2°   |
| NMBz-II      | H11---O19: 2.552 | $\angle$ C10-H11-O19= 124.7° |
|              | H9---O19: 2.608  | $\angle$ C7-H9-O19= 119.5°   |

**Table S2.** Comparison of experimental shifts associated with the perturbed modes of submolecules within NMAc and NMBz dimers, with those predicted by harmonic frequency calculations at B2PLYP/aug-cc-pVDZ level of theory with empirical dispersion GD3.

| Computed wavenumber(cm <sup>-1</sup> ) |             | Experimental wavenumber(cm <sup>-1</sup> ) |             | Experimental wavenumber(cm <sup>-1</sup> ) |             | Mode assignment                                                                      |
|----------------------------------------|-------------|--------------------------------------------|-------------|--------------------------------------------|-------------|--------------------------------------------------------------------------------------|
|                                        |             | Ar Matrix                                  |             | N <sub>2</sub> Matrix                      |             |                                                                                      |
| $\nu$                                  | $\Delta\nu$ | $\nu$                                      | $\Delta\nu$ | $\nu$                                      | $\Delta\nu$ |                                                                                      |
| <b>C-H stretching region</b>           |             |                                            |             |                                            |             |                                                                                      |
| 3431.6 (94.7)                          | -           | 3288.6/3302.9                              | -           | 3282.8/3311.0                              | -           | Fermi diad of $\nu_3$ & $\nu_2+\nu_4+\nu_5$ of C <sub>2</sub> H <sub>2</sub> monomer |
| 3418.1(106.4)                          | -13.5       | -- <sup>b</sup>                            | -           | 3266.7                                     | -16.1       | 1:1NMAc-I heterodimer                                                                |
| 3408.2(112)                            | -23.8       | 3264.0                                     | -24.6       | -- <sup>b</sup>                            | -           | 2:1::NM:Ac trimer                                                                    |
| 3406.6 (203)                           | -25.0       | 3260.9/3258.3                              | -29.0       | 3264.7                                     | -18.1       | 1:2::NM:Ac trimer (proton accepting acetylene)                                       |
| 3393.2 (229)                           | -38.4       | 3255.1                                     | -33.5       | 3251.1/3250.8                              | -31.9       | 1:1NMAc-IIheterodimer                                                                |
| 3390.6 (225)                           | -41.0       | 3240.2                                     | -48.4       | 3248.9/3245.3                              | -35.7       | 1:2::NM:Ac trimer(proton donating acetylene)                                         |

| <b>C-H bending region</b>      |       |                 |      |                 |      |                                                                      |
|--------------------------------|-------|-----------------|------|-----------------|------|----------------------------------------------------------------------|
| 683.5 (114)                    | -     | 675.0           | -    | 678.3           | -    | v <sub>4</sub> out-of-plane bending of C <sub>6</sub> H <sub>6</sub> |
| 690.2(118)                     | 6.7   | 681.2           | 6.2  | 687.5/686.1     | 8.5  | 1:1 NMBz-I heterodimer                                               |
| 691.4(105)                     | 7.9   | -- <sup>b</sup> |      | -- <sup>b</sup> |      | 1:1 NMBz-II heterodimer                                              |
| <b>O=N=O stretching region</b> |       |                 |      |                 |      |                                                                      |
| 1616.6(257)                    | -     | 1570.0          | -    | 1572.7          | -    | v <sub>3</sub> Mode of NM monomer                                    |
| 1611.5(223)                    | -4.9  | -- <sup>b</sup> | -    | 1570.8          | -1.9 | 1:1 NMAc-I heterodimer                                               |
| 1612.4(296)                    | -6.8  | 1568.4          | -1.6 |                 |      | 1:1 NMAc-II heterodimer                                              |
| 1608.1(205)                    | -8.5  | -- <sup>b</sup> | -    | -- <sup>b</sup> | -    | 1:2::NM:Ac trimer                                                    |
| 1608.2(162)                    | -8.4  | -- <sup>b</sup> | -    | -- <sup>b</sup> | -    | 2:1::NM:Ac trimer                                                    |
| 1606.0(300)                    | -10.6 | -- <sup>b</sup> | -    | -- <sup>b</sup> | -    | 2:1::NM:Ac trimer                                                    |
| 1611.2(190)                    | -5.4  | 1568.1          | -1.9 | 1570.2          | -2.5 | 1:1NMBz-I heterodimer                                                |
| 1614.1(288)                    | -2.5  | -- <sup>b</sup> |      | -- <sup>b</sup> |      | 1:1NMBz-II heterodimer                                               |

<sup>b</sup>features were not discerned.

**Table S3.** NBO delocalization and associated second order perturbation energies, in NMAc and NMBz heterodimers.

| Heterodimers    | NBO      | Donor-acceptor delocalization interaction          | E <sub>2</sub><br>(Kcal/mol) |
|-----------------|----------|----------------------------------------------------|------------------------------|
| <b>NMBz I</b>   | Bz to NM | $\pi(\text{C1-C3})$ to $\sigma^*(\text{C15-H16})$  | 0.77                         |
|                 |          | $\pi(\text{C2-C6})$ to $\sigma^*(\text{C15-H16})$  | 0.54                         |
|                 |          | $\pi(\text{C7-C10})$ to $\sigma^*(\text{C15-H16})$ | 0.29                         |
|                 |          | $\pi(\text{C7-C10})$ to $\pi^*(\text{N17-O18})$    | 0.13                         |
|                 | NM to Bz | $\pi^*(\text{N17-O18})$ to $\pi^*(\text{C7-C10})$  | 0.36                         |
|                 |          | nO19 to $\pi^*(\text{C7-C10})$                     | 0.17                         |
|                 |          | nO19 to $\pi^*(\text{C2-C6})$                      | 0.15                         |
| <b>NMBz II</b>  | NM to Bz | nO19 to $\pi^*(\text{C10-H11})$                    | 0.70                         |
|                 |          | nO19 to $\pi^*(\text{C7-H9})$                      | 0.69                         |
| <b>NMAc I</b>   | NM to Ac | $\pi(\text{O1-N2})$ to $\pi^*(\text{C8-C9})$       | 0.45                         |
|                 |          | nO3 to $\sigma^*(\text{C9-H10})$                   | 0.26                         |
|                 | Ac to NM | $\pi(\text{C8-C9})$ to $\pi^*(\text{O1-N2})$       | 0.14                         |
|                 |          | $\pi(\text{C8-C9})$ to $\sigma^*(\text{C4-H5})$    | 0.96                         |
| <b>NMAc II</b>  | NM to Ac | n <sup>1</sup> O1 to $\sigma^*(\text{C8-H11})$     | 4.12                         |
| <b>NMAc III</b> | NM to Ac | $\pi(\text{C8-C9})$ to $\pi^*(\text{O1-N2})$       | 0.18                         |
|                 |          | $\pi(\text{C8-C9})$ to $\sigma^*(\text{C4-H5})$    | 0.15                         |
|                 | Ac to NM | $\pi(\text{O1-N2})$ to $\pi^*(\text{C8-C9})$       | 0.37                         |

**Table S4: Co-ordinates of all the heterodimers in different levels of theory**

**MP2/aug-cc-pVTZ**

NMBz-I

|   |              |              |              |
|---|--------------|--------------|--------------|
| 6 | 1.042082000  | -1.203223000 | -0.796882000 |
| 6 | 1.930516000  | -1.211936000 | 0.278946000  |
| 6 | 0.604937000  | 0.009048000  | -1.330681000 |
| 1 | 2.270491000  | -2.152757000 | 0.692318000  |
| 1 | -0.095196000 | 0.015558000  | -2.155992000 |
| 6 | 2.379808000  | -0.008021000 | 0.822733000  |
| 6 | 1.050012000  | 1.212817000  | -0.784335000 |
| 1 | 3.070408000  | -0.014540000 | 1.656212000  |
| 1 | 0.699125000  | 2.151736000  | -1.192033000 |
| 6 | 1.938390000  | 1.204416000  | 0.291539000  |
| 1 | 2.284713000  | 2.138576000  | 0.714640000  |
| 1 | 0.684239000  | -2.135466000 | -1.213767000 |
| 1 | -1.653244000 | 0.892030000  | 2.038531000  |
| 1 | -1.649858000 | -0.914274000 | 2.026882000  |
| 6 | -1.363636000 | -0.007206000 | 1.507554000  |
| 1 | -0.295101000 | -0.003791000 | 1.298351000  |
| 7 | -2.043784000 | 0.000077000  | 0.192086000  |
| 8 | -2.282135000 | -1.089077000 | -0.327187000 |
| 8 | -2.280583000 | 1.094954000  | -0.315686000 |



NMBz-II

|   |              |              |              |
|---|--------------|--------------|--------------|
| 6 | 3.647500000  | 0.757566000  | 0.009740000  |
| 6 | 3.706499000  | -0.635470000 | 0.024468000  |
| 6 | 2.410976000  | 1.401826000  | -0.016515000 |
| 1 | 4.666014000  | -1.135927000 | 0.044773000  |
| 1 | 2.365947000  | 2.483379000  | -0.028115000 |
| 6 | 2.529314000  | -1.383133000 | 0.012955000  |
| 6 | 1.234429000  | 0.653506000  | -0.027882000 |
| 1 | 2.576017000  | -2.464470000 | 0.024297000  |
| 1 | 0.271028000  | 1.145082000  | -0.048169000 |
| 6 | 1.292505000  | -0.739758000 | -0.013162000 |
| 1 | 0.375187000  | -1.312870000 | -0.022234000 |
| 1 | 4.561005000  | 1.338077000  | 0.018593000  |
| 1 | -3.425152000 | 1.719710000  | -0.848510000 |
| 1 | -4.845805000 | 1.100076000  | 0.062564000  |
| 6 | -3.767831000 | 1.196178000  | 0.038206000  |
| 1 | -3.382009000 | 1.685445000  | 0.926781000  |
| 7 | -3.180368000 | -0.167017000 | -0.002285000 |
| 8 | -3.949108000 | -1.126095000 | -0.001115000 |
| 8 | -1.953394000 | -0.235615000 | -0.033989000 |

NMAc-I

|   |              |              |              |
|---|--------------|--------------|--------------|
| 8 | 1.028707000  | -0.639749000 | 1.121442000  |
| 7 | 1.043945000  | -0.117417000 | 0.008398000  |
| 8 | 1.029267000  | -0.725761000 | -1.060456000 |
| 1 | -0.041631000 | 1.634028000  | -0.070604000 |
| 6 | 1.011129000  | 1.362275000  | -0.050691000 |
| 1 | 1.491083000  | 1.744723000  | 0.842049000  |
| 1 | 1.505838000  | 1.672737000  | -0.963145000 |
| 6 | -2.686113000 | 0.394068000  | 0.015111000  |
| 6 | -1.997338000 | -0.604123000 | -0.022392000 |
| 1 | -1.386870000 | -1.474793000 | -0.056048000 |
| 1 | -3.305887000 | 1.255982000  | 0.048912000  |

NMAc-II

|   |              |              |              |
|---|--------------|--------------|--------------|
| 8 | 0.744295000  | -1.129480000 | 0.038552000  |
| 7 | 1.391296000  | -0.083429000 | 0.001235000  |
| 8 | 2.615789000  | -0.010975000 | -0.064863000 |
| 1 | 1.320739000  | 2.005953000  | -0.009645000 |
| 6 | 0.618441000  | 1.183835000  | 0.041605000  |
| 1 | -0.066244000 | 1.174716000  | -0.800584000 |
| 1 | 0.050719000  | 1.187592000  | 0.966816000  |
| 6 | -3.486150000 | 0.199181000  | -0.033636000 |
| 6 | -2.462761000 | -0.451824000 | 0.004521000  |
| 1 | -1.554269000 | -1.007336000 | 0.037090000  |
| 1 | -4.387877000 | 0.759564000  | -0.066762000 |

NMAc-III

|   |              |              |              |
|---|--------------|--------------|--------------|
| 6 | -1.175272000 | -0.000680000 | 1.254395000  |
| 1 | -1.719241000 | -0.903145000 | 1.506784000  |
| 1 | -0.191974000 | -0.000969000 | 1.717644000  |
| 1 | -1.719163000 | 0.901567000  | 1.507730000  |
| 7 | -0.939630000 | 0.000076000  | -0.208480000 |
| 8 | -0.825214000 | -1.092042000 | -0.760343000 |
| 8 | -0.825344000 | 1.092767000  | -0.759238000 |
| 6 | 2.176506000  | -0.606746000 | 0.099177000  |
| 6 | 2.176318000  | 0.606787000  | 0.099636000  |
| 1 | 2.173859000  | -1.669086000 | 0.081859000  |
| 1 | 2.173079000  | 1.669132000  | 0.082739000  |

**MP2/aug-cc-pVDZ**

NMBz-I

|   |              |              |              |
|---|--------------|--------------|--------------|
| 6 | 1.015304000  | -1.208975000 | -0.815231000 |
| 6 | 1.920127000  | -1.229112000 | 0.264759000  |
| 6 | 0.575917000  | 0.020745000  | -1.343211000 |
| 1 | 2.261044000  | -2.184325000 | 0.675258000  |
| 1 | -0.137027000 | 0.036094000  | -2.172569000 |
| 6 | 2.383287000  | -0.019024000 | 0.818743000  |
| 6 | 1.035500000  | 1.230631000  | -0.787336000 |
| 1 | 3.084942000  | -0.034457000 | 1.658058000  |
| 1 | 0.681950000  | 2.184096000  | -1.189884000 |
| 6 | 1.940216000  | 1.211015000  | 0.292840000  |
| 1 | 2.296644000  | 2.150786000  | 0.725200000  |
| 1 | 0.646023000  | -2.146938000 | -1.239457000 |
| 1 | -1.593459000 | -0.950089000 | 2.026704000  |
| 1 | -0.254863000 | 0.020777000  | 1.297381000  |
| 6 | -1.330301000 | -0.016109000 | 1.519732000  |
| 1 | -1.643520000 | 0.874615000  | 2.074340000  |
| 7 | -2.028493000 | 0.000119000  | 0.204055000  |
| 8 | -2.271066000 | 1.106510000  | -0.297913000 |
| 8 | -2.276758000 | -1.092312000 | -0.325237000 |

NMBz-II

|   |              |              |              |
|---|--------------|--------------|--------------|
| 6 | 3.662920000  | 0.765234000  | 0.006114000  |
| 6 | 3.722896000  | -0.641515000 | 0.020871000  |
| 6 | 2.414039000  | 1.415657000  | -0.015447000 |
| 1 | 4.693274000  | -1.147174000 | 0.037570000  |
| 1 | 2.368322000  | 2.509117000  | -0.027045000 |
| 6 | 2.534384000  | -1.396977000 | 0.014071000  |
| 6 | 1.226121000  | 0.659416000  | -0.022123000 |
| 1 | 2.582034000  | -2.490167000 | 0.025414000  |
| 1 | 0.252458000  | 1.156346000  | -0.038960000 |
| 6 | 1.285150000  | -0.747435000 | -0.007462000 |
| 1 | 0.358535000  | -1.327427000 | -0.013016000 |
| 1 | 4.586455000  | 1.352305000  | 0.011307000  |
| 1 | -3.418366000 | 1.734943000  | -0.856328000 |
| 1 | -4.862648000 | 1.108907000  | 0.053322000  |
| 6 | -3.773212000 | 1.205697000  | 0.036422000  |
| 1 | -3.387480000 | 1.695243000  | 0.939020000  |
| 7 | -3.186439000 | -0.167327000 | -0.003760000 |
| 8 | -3.962210000 | -1.132477000 | -0.005187000 |
| 8 | -1.950453000 | -0.240182000 | -0.032267000 |

NMAc-I

|   |              |              |              |
|---|--------------|--------------|--------------|
| 8 | 1.044541000  | -0.642475000 | 1.128970000  |
| 7 | 1.055213000  | -0.110491000 | 0.010163000  |
| 8 | 1.055371000  | -0.719990000 | -1.068631000 |
| 1 | -0.071226000 | 1.628833000  | -0.142807000 |
| 6 | 0.993861000  | 1.377347000  | -0.047136000 |
| 1 | 1.408410000  | 1.768190000  | 0.887564000  |
| 1 | 1.550938000  | 1.702119000  | -0.932269000 |
| 6 | -2.733314000 | 0.369113000  | 0.015592000  |
| 6 | -1.985591000 | -0.609700000 | -0.027870000 |
| 1 | -1.338097000 | -1.469529000 | -0.063315000 |
| 1 | -3.385548000 | 1.222982000  | 0.053463000  |

NMAc-II

|   |              |              |              |
|---|--------------|--------------|--------------|
| 8 | -0.911464000 | -1.144267000 | -0.673501000 |
| 7 | -0.940617000 | -0.010479000 | -0.176575000 |
| 8 | -0.936911000 | 1.050831000  | -0.812493000 |
| 1 | -2.055798000 | 0.301974000  | 1.565764000  |
| 6 | -1.008947000 | 0.091934000  | 1.309799000  |
| 1 | -0.681683000 | -0.864366000 | 1.728878000  |
| 1 | -0.364462000 | 0.923594000  | 1.612163000  |
| 6 | 2.215652000  | 0.607954000  | -0.003990000 |
| 6 | 2.145897000  | -0.620833000 | 0.060871000  |
| 1 | 2.080467000  | -1.693791000 | 0.096427000  |
| 1 | 2.277177000  | 1.679096000  | -0.079336000 |



NMAc-III

|   |              |              |              |
|---|--------------|--------------|--------------|
| 8 | 0.741187000  | 1.135097000  | -0.028325000 |
| 7 | 1.401487000  | 0.085929000  | -0.002123000 |
| 8 | 2.636542000  | 0.025372000  | 0.044875000  |
| 1 | 1.356578000  | -2.017720000 | -0.020080000 |
| 6 | 0.634646000  | -1.195960000 | -0.027495000 |
| 1 | -0.014239000 | -1.205887000 | 0.856819000  |
| 1 | 0.018650000  | -1.190895000 | -0.934829000 |
| 6 | -3.540772000 | -0.174435000 | 0.021323000  |
| 6 | -2.460246000 | 0.418376000  | -0.000559000 |
| 1 | -1.503666000 | 0.917651000  | -0.019203000 |
| 1 | -4.491330000 | -0.676296000 | 0.040143000  |

**B2PLYP/aug-cc-pVDZ**

NMBz-I

|   |              |              |              |
|---|--------------|--------------|--------------|
| 6 | 1.053827000  | -1.176792000 | -0.838255000 |
| 6 | 1.938272000  | -1.246572000 | 0.248159000  |
| 6 | 0.650728000  | 0.070759000  | -1.335399000 |
| 1 | 2.250978000  | -2.216928000 | 0.635283000  |
| 1 | -0.050620000 | 0.124570000  | -2.167807000 |
| 6 | 2.418253000  | -0.068210000 | 0.838830000  |
| 6 | 1.128274000  | 1.248877000  | -0.743699000 |
| 1 | 3.105806000  | -0.122248000 | 1.683568000  |
| 1 | 0.802873000  | 2.217633000  | -1.122819000 |
| 6 | 2.012941000  | 1.179821000  | 0.342709000  |
| 1 | 2.384075000  | 2.096165000  | 0.802937000  |
| 1 | 0.669498000  | -2.091217000 | -1.289902000 |
| 1 | -1.699400000 | -0.948725000 | 2.014414000  |
| 1 | -0.348431000 | 0.012512000  | 1.310693000  |
| 6 | -1.423942000 | -0.018536000 | 1.514106000  |
| 1 | -1.741544000 | 0.872225000  | 2.059545000  |
| 7 | -2.097870000 | -0.000134000 | 0.181255000  |
| 8 | -2.336097000 | 1.101630000  | -0.317715000 |
| 8 | -2.333686000 | -1.086522000 | -0.351461000 |

NMBz-II

|   |              |              |              |
|---|--------------|--------------|--------------|
| 6 | 3.662920000  | 0.765234000  | 0.006114000  |
| 6 | 3.722896000  | -0.641515000 | 0.020871000  |
| 6 | 2.414039000  | 1.415657000  | -0.015447000 |
| 1 | 4.693274000  | -1.147174000 | 0.037570000  |
| 1 | 2.368322000  | 2.509117000  | -0.027045000 |
| 6 | 2.534384000  | -1.396977000 | 0.014071000  |
| 6 | 1.226121000  | 0.659416000  | -0.022123000 |
| 1 | 2.582034000  | -2.490167000 | 0.025414000  |
| 1 | 0.252458000  | 1.156346000  | -0.038960000 |
| 6 | 1.285150000  | -0.747435000 | -0.007462000 |
| 1 | 0.358535000  | -1.327427000 | -0.013016000 |
| 1 | 4.586455000  | 1.352305000  | 0.011307000  |
| 1 | -3.418366000 | 1.734943000  | -0.856328000 |
| 1 | -4.862648000 | 1.108907000  | 0.053322000  |
| 6 | -3.773212000 | 1.205697000  | 0.036422000  |
| 1 | -3.387480000 | 1.695243000  | 0.939020000  |
| 7 | -3.186439000 | -0.167327000 | -0.003760000 |
| 8 | -3.962210000 | -1.132477000 | -0.005187000 |
| 8 | -1.950453000 | -0.240182000 | -0.032267000 |

NMAc-I

|   |              |              |              |
|---|--------------|--------------|--------------|
| 8 | 1.097214000  | -0.626051000 | 1.125826000  |
| 7 | 1.074152000  | -0.111126000 | 0.006445000  |
| 8 | 1.051229000  | -0.731445000 | -1.059233000 |
| 1 | -0.073037000 | 1.614408000  | -0.068677000 |
| 6 | 0.997134000  | 1.378526000  | -0.065210000 |
| 1 | 1.484269000  | 1.783930000  | 0.823802000  |
| 1 | 1.468796000  | 1.694906000  | -0.997747000 |
| 6 | -2.775299000 | 0.354184000  | 0.028699000  |
| 6 | -2.019445000 | -0.599837000 | -0.020615000 |
| 1 | -1.341300000 | -1.429834000 | -0.066411000 |
| 1 | -3.459685000 | 1.177194000  | 0.073928000  |

NMAc-II

|   |              |              |              |
|---|--------------|--------------|--------------|
| 8 | 0.739364000  | -1.131361000 | 0.028327000  |
| 7 | 1.399787000  | -0.087271000 | 0.001859000  |
| 8 | 2.627374000  | -0.029412000 | -0.044386000 |
| 1 | 1.351661000  | 2.018139000  | 0.017132000  |
| 6 | 0.632889000  | 1.197853000  | 0.027108000  |
| 1 | -0.017150000 | 1.202960000  | -0.852752000 |
| 1 | 0.019226000  | 1.190626000  | 0.932467000  |
| 6 | -3.528464000 | 0.167346000  | -0.021051000 |
| 6 | -2.455600000 | -0.410462000 | 0.000518000  |
| 1 | -1.503720000 | -0.910626000 | 0.019258000  |
| 1 | -4.475383000 | 0.667559000  | -0.040097000 |

NMAc-III\*

|   |              |              |              |
|---|--------------|--------------|--------------|
| 8 | -0.765061000 | -1.111648000 | 0.394478000  |
| 7 | -1.341712000 | -0.087688000 | 0.012904000  |
| 8 | -2.392183000 | -0.064547000 | -0.626283000 |
| 1 | -1.338162000 | 2.018632000  | -0.010479000 |
| 6 | -0.698992000 | 1.217572000  | 0.363284000  |
| 1 | -0.595721000 | 1.240102000  | 1.451881000  |
| 1 | 0.292350000  | 1.222921000  | -0.100816000 |
| 6 | 3.378810000  | 0.209330000  | -0.273401000 |
| 6 | 2.405867000  | -0.461754000 | 0.022915000  |
| 1 | 1.534639000  | -1.035875000 | 0.280469000  |
| 1 | 4.242712000  | 0.786706000  | -0.533736000 |
